# Supplementary material
Source: MDPI journal article supplement (https://www.mdpi.com/2075-163X/14/1/109)
Supplement: s1 [file s1]

## Electronic Supplementary Material

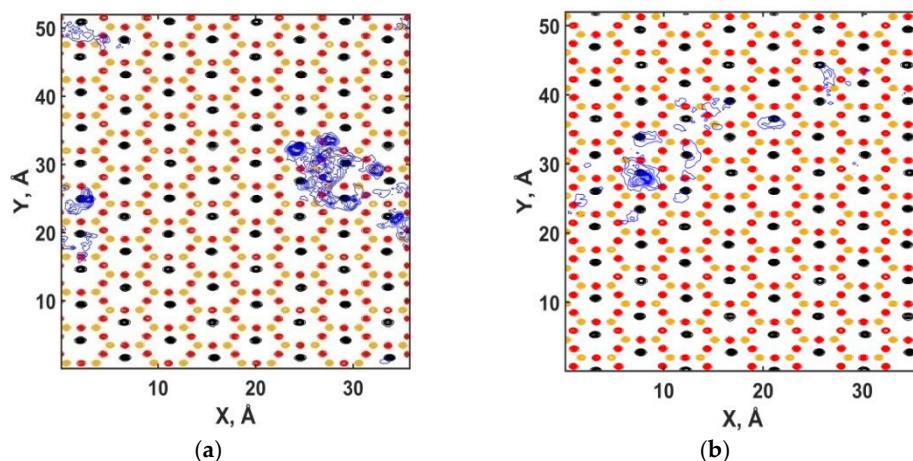

**Figure S1.** Time-averaged atomic density distributions of uranium at the basal surface of smectite. Red – bridging oxygen atoms,  $O_b$ ; yellow – tetrahedral Si; black – hydrogen atoms of structural hydroxyls,  $H_o$ ; blue – U. (a) ClayFF-orig; (b) ClayFF-MOH.

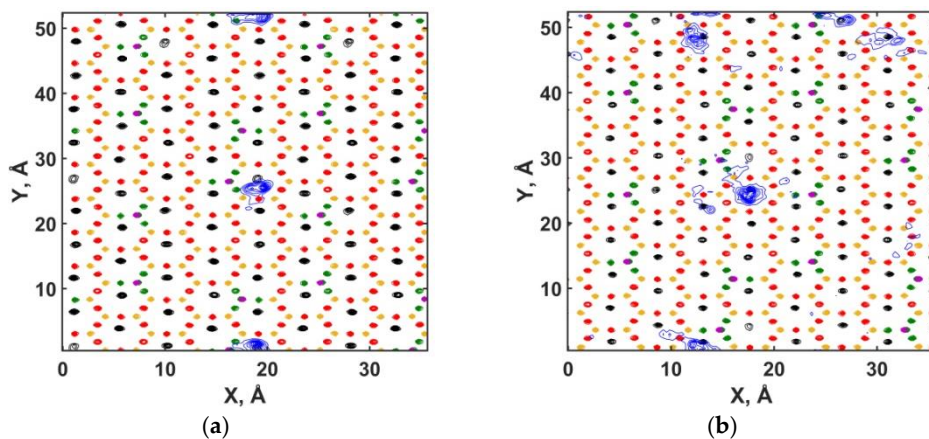

**Figure S2.** Time-averaged atomic density distributions of uranium on the basal surface of illite. Red – bridging oxygen atoms,  $O_b$ ; yellow – tetrahedral Si; black – hydrogen atoms of structural hydroxyls,  $H_o$ ; purple – Al of the tetrahedral substitutions; green – oxygen atoms next to the tetrahedral Al/Si substitutions,  $O_{bts}$ ; blue – U. (a) ClayFF-orig; (b) ClayFF-MOH.

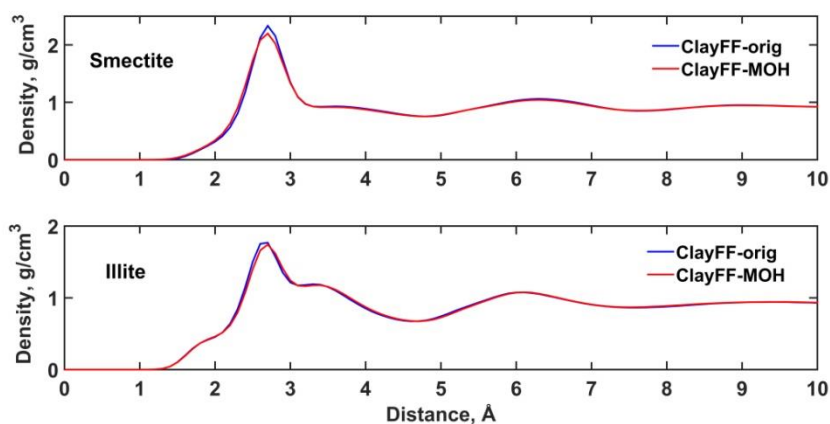

**Figure S3.** Atomic density profiles of  $O_w$  atoms of  $H_2O$  molecules for both versions of ClayFF force field as functions of their distance from the basal clay surface.

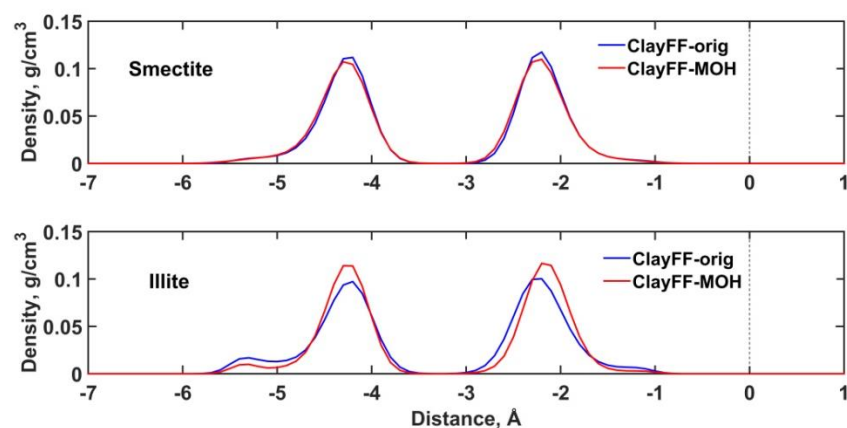

**Figure S4.** Atomic density profiles of Ho atoms as functions of their distance from the basal clay surface modeled with two versions of the ClayFF force field.

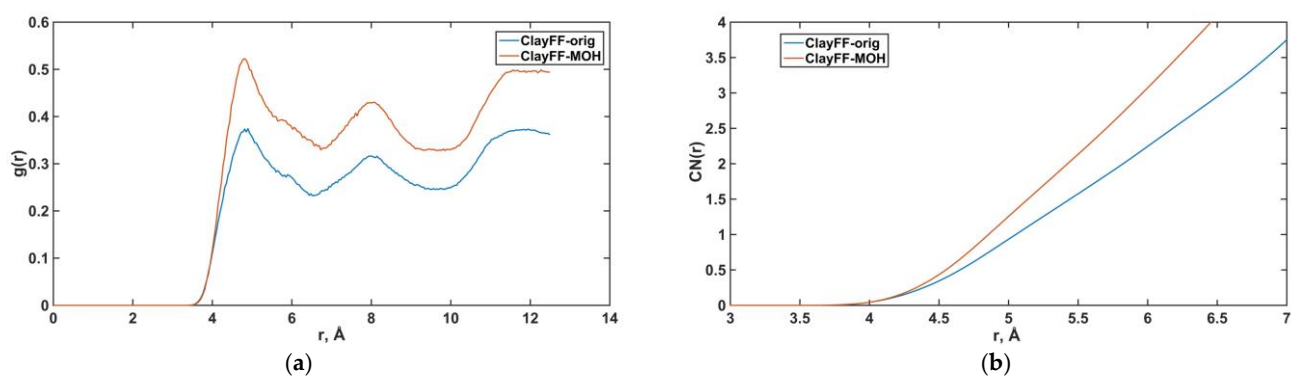

**Figure S5.** (a) Radial distribution functions for U-O<sub>b</sub> pairs; (b) Running coordination numbers for U-O<sub>b</sub> pairs (smectite model).

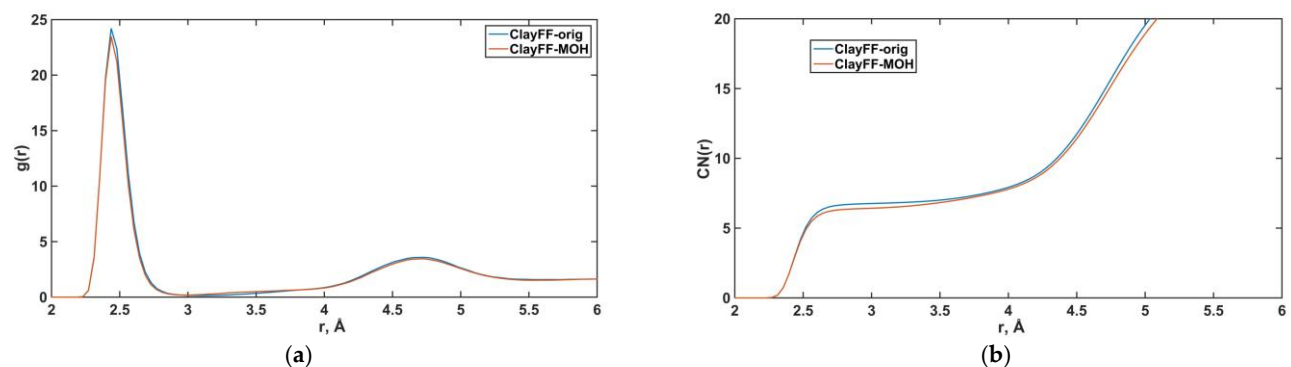

**Figure S6.** (a) Radial distribution functions for Ca-O<sub>w</sub> pairs; (b) Running coordination numbers for Ca-O<sub>w</sub> pairs (smectite model).

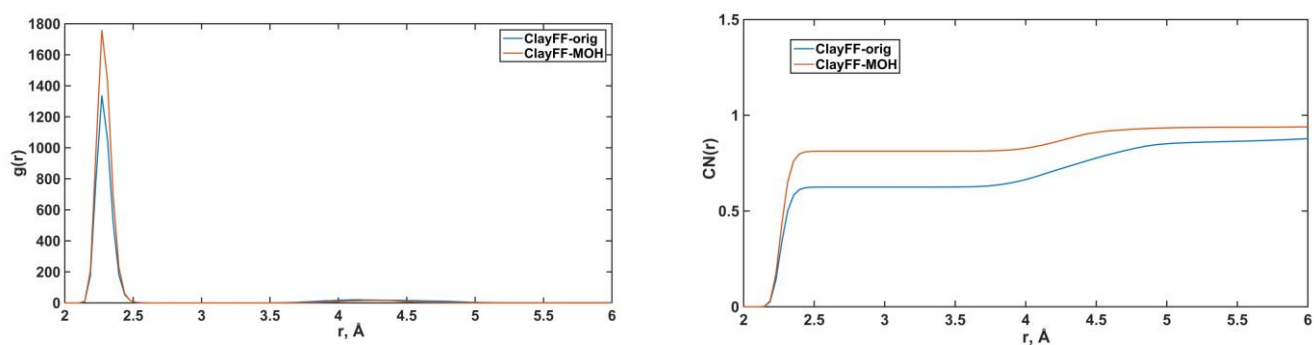

(a)

(b)

**Figure S7.** (a) Radial distribution functions for Ca-O<sub>hw</sub> pairs; (b) Running coordination numbers for Ca-O<sub>hw</sub> pairs (smectite model).

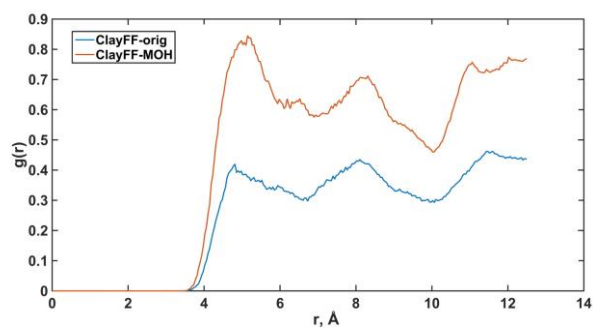

(a)

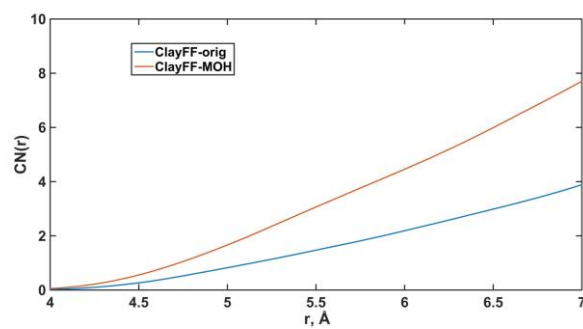

(b)

**Figure S8.** (a) Radial distribution functions for U-O<sub>b</sub> pairs; (b) Running coordination numbers for U-O<sub>b</sub> pairs (illite model).

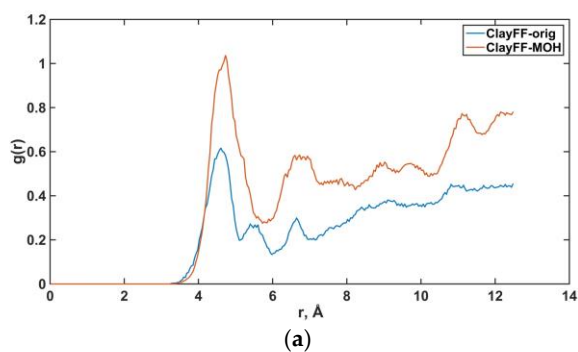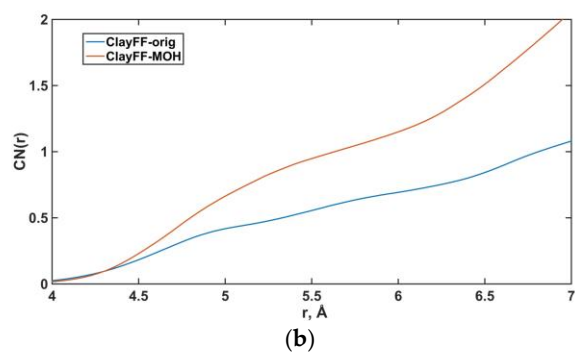

**Figure S9.** (a) Radial distribution functions for U-O<sub>bts</sub> pairs; (b) Running coordination numbers for U-O<sub>bts</sub> pairs (illite model). O<sub>bts</sub> – Oxygen atom near tetrahedral substitution.

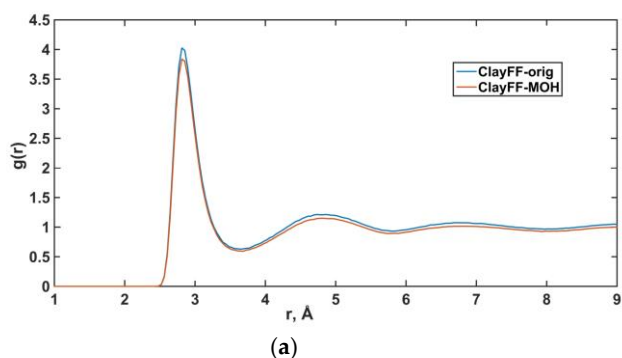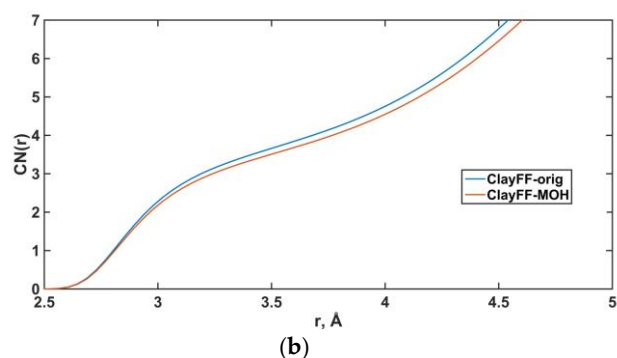

**Figure S10.** (a) Radial distribution functions for K-O<sub>w</sub> pairs; (b) Running coordination numbers for K-O<sub>w</sub> pairs (illite model).

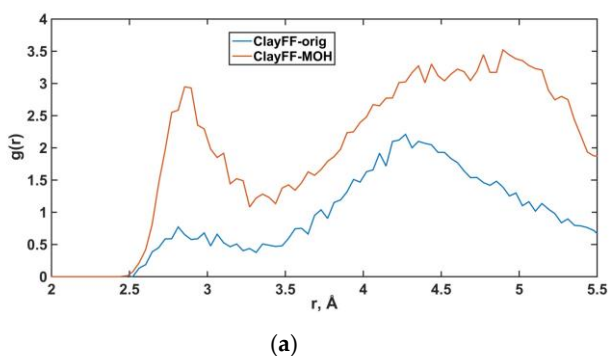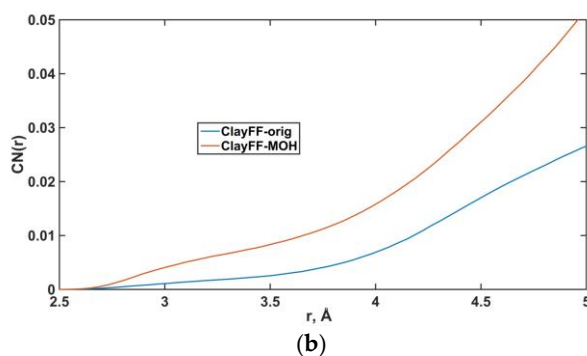

**Figure S11.** (a) Radial distribution functions for K-O<sub>hw</sub> pairs; (b) Running coordination numbers for K-O<sub>hw</sub> pairs (illite model).
